# Supplementary material
Source: PubMed Central journal article supplement (PMC9759802)
Supplement: mmc1.pdf [file mmc1.pdf]

# THE LANCET

## Infectious Diseases

### Supplementary appendix

This appendix formed part of the original submission. We post it as supplied by the authors.

Supplement to: Rana S, Shah R, Ahmed S, Mothabbir G. Post-disruption catch-up of child immunisation and health-care services in Bangladesh. *Lancet Infect Dis* 2021; published online March 30. [http://dx.doi.org/10.1016/S1473-3099\(21\)00148-1](http://dx.doi.org/10.1016/S1473-3099(21)00148-1).

Figure 1: Care seeking for sick under-5 children in Barishal, Bangladesh, 2019 vs 2020

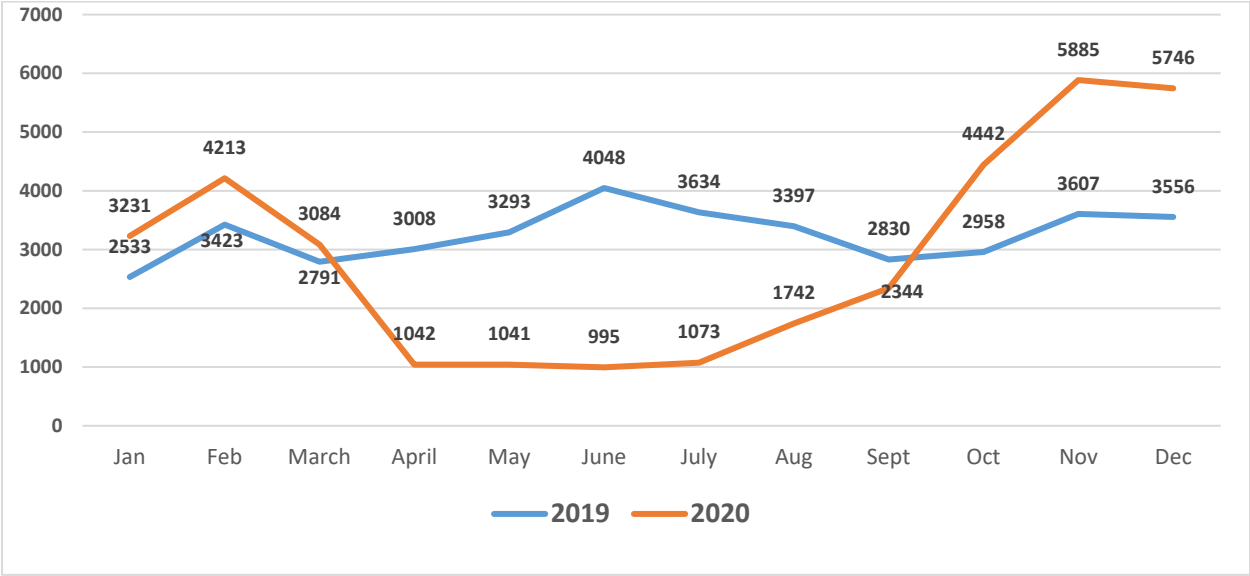

Figure 2: Proportion of immunization sessions held in Barishal, Bangladesh, during Jan – Oct, 2019 vs 2020

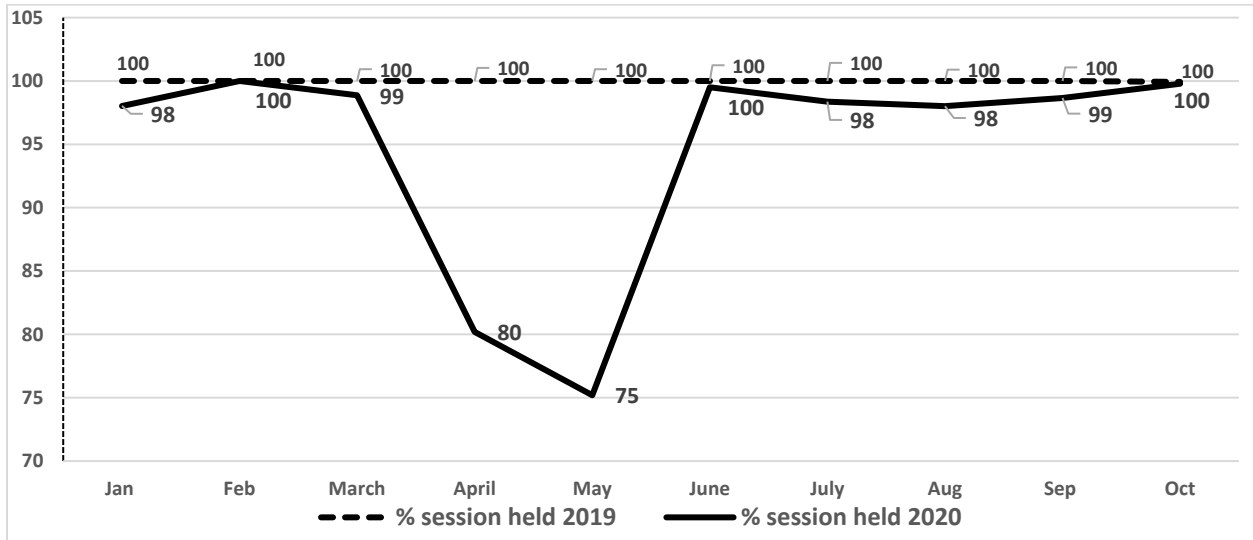

| Month                 | Sub-district Name   | 2020                           |                             |                       | # Immunization Session Planned |
|-----------------------|---------------------|--------------------------------|-----------------------------|-----------------------|--------------------------------|
|                       |                     | # Immunization Session Planned | # Immunization Session Held | Care-seeking children |                                |
| January               | Bakerganj Upazila   | 373                            | 373                         | 667                   | 139                            |
|                       | Banaripara Upazila  | 217                            | 217                         | 110                   | 371                            |
|                       | Hijla Upazila       | 166                            | 166                         | 1152                  | 219                            |
|                       | Mehendiganj Upazila | 334                            | 306                         | 998                   | 167                            |
|                       | Muladi Upazila      | 194                            | 194                         | 136                   | 312                            |
|                       | Agailjhara Upazila  | 138                            | 138                         | 168                   | 195                            |
| <b>January Total</b>  |                     | <b>1422</b>                    | <b>1394</b>                 | <b>3231</b>           | <b>1403</b>                    |
| February              | Bakerganj Upazila   | 371                            | 371                         | 901                   | 136                            |
|                       | Banaripara Upazila  | 217                            | 217                         | 549                   | 364                            |
|                       | Hijla Upazila       | 165                            | 165                         | 1407                  | 215                            |
|                       | Mehendiganj Upazila | 332                            | 332                         | 1066                  | 163                            |
|                       | Muladi Upazila      | 193                            | 193                         | 165                   | 312                            |
|                       | Agailjhara Upazila  | 138                            | 138                         | 125                   | 191                            |
| <b>February Total</b> |                     | <b>1416</b>                    | <b>1416</b>                 | <b>4213</b>           | <b>1381</b>                    |
| March                 | Bakerganj Upazila   | 371                            | 371                         | 407                   | 138                            |
|                       | Banaripara Upazila  | 217                            | 217                         | 680                   | 371                            |
|                       | Hijla Upazila       | 166                            | 166                         | 975                   | 216                            |
|                       | Mehendiganj Upazila | 333                            | 317                         | 866                   | 162                            |
|                       | Muladi Upazila      | 193                            | 193                         | 61                    | 312                            |
|                       | Agailjhara Upazila  | 137                            | 137                         | 95                    | 191                            |
| <b>March Total</b>    |                     | <b>1417</b>                    | <b>1401</b>                 | <b>3084</b>           | <b>1390</b>                    |
| April                 | Bakerganj Upazila   | 372                            | 372                         | 244                   | 143                            |
|                       | Banaripara Upazila  | 216                            | 162                         | 114                   | 371                            |
|                       | Hijla Upazila       | 165                            | 116                         | 228                   | 216                            |
|                       | Mehendiganj Upazila | 332                            | 245                         | 304                   | 139                            |
|                       | Muladi Upazila      | 192                            | 141                         | 58                    | 312                            |
|                       | Agailjhara Upazila  | 137                            | 98                          | 94                    | 192                            |
| <b>April Total</b>    |                     | <b>1414</b>                    | <b>1134</b>                 | <b>1042</b>           | <b>1373</b>                    |
| May                   | Bakerganj Upazila   | 370                            | 238                         | 205                   | 120                            |
|                       | Banaripara Upazila  | 213                            | 213                         | 133                   | 370                            |
|                       | Hijla Upazila       | 157                            | 21                          | 269                   | 216                            |
|                       | Mehendiganj Upazila | 328                            | 280                         | 252                   | 163                            |
|                       | Muladi Upazila      | 189                            | 189                         | 88                    | 312                            |
|                       | Agailjhara Upazila  | 138                            | 108                         | 94                    | 192                            |
| <b>May Total</b>      |                     | <b>1395</b>                    | <b>1049</b>                 | <b>1041</b>           | <b>1373</b>                    |
| June                  | Bakerganj Upazila   | 374                            | 373                         | 182                   | 142                            |
|                       | Banaripara Upazila  | 218                            | 218                         | 123                   | 366                            |
|                       | Hijla Upazila       | 156                            | 156                         | 314                   | 214                            |
|                       | Mehendiganj Upazila | 334                            | 328                         | 262                   | 162                            |
|                       | Muladi Upazila      | 194                            | 194                         | 94                    | 312                            |
|                       | Agailjhara Upazila  | 138                            | 138                         | 20                    | 190                            |
| <b>June Total</b>     |                     | <b>1414</b>                    | <b>1407</b>                 | <b>995</b>            | <b>1386</b>                    |
|                       | Bakerganj Upazila   | 372                            | 372                         | 169                   | 136                            |
|                       | Banaripara Upazila  | 218                            | 218                         | 119                   | 369                            |

|                                |                     |              |              |              |              |
|--------------------------------|---------------------|--------------|--------------|--------------|--------------|
| July                           | Hijla Upazila       | 157          | 157          | 450          | 219          |
|                                | Mehendiganj Upazila | 334          | 311          | 210          | 159          |
|                                | Muladi Upazila      | 194          | 194          | 95           | 312          |
|                                | Agailjhara Upazila  | 138          | 138          | 30           | 195          |
| <b>July Total</b>              |                     | <b>1413</b>  | <b>1390</b>  | <b>1073</b>  | <b>1390</b>  |
| August                         | Bakerganj Upazila   | 372          | 372          | 132          | 134          |
|                                | Banaripara Upazila  | 214          | 214          | 256          | 368          |
|                                | Hijla Upazila       | 155          | 155          | 508          | 214          |
|                                | Mehendiganj Upazila | 335          | 307          | 720          | 166          |
|                                | Muladi Upazila      | 192          | 192          | 60           | 312          |
|                                | Agailjhara Upazila  | 138          | 138          | 66           | 193          |
| <b>August Total</b>            |                     | <b>1406</b>  | <b>1378</b>  | <b>1742</b>  | <b>1387</b>  |
| September                      | Bakerganj Upazila   | 373          | 373          | 448          | 138          |
|                                | Banaripara Upazila  | 218          | 218          | 412          | 367          |
|                                | Hijla Upazila       | 158          | 158          | 928          | 217          |
|                                | Mehendiganj Upazila | 338          | 319          | 254          | 165          |
|                                | Muladi Upazila      | 194          | 194          | 167          | 312          |
|                                | Agailjhara Upazila  | 138          | 138          | 135          | 193          |
| <b>September Total</b>         |                     | <b>1419</b>  | <b>1400</b>  | <b>2344</b>  | <b>1392</b>  |
| October                        | Bakerganj Upazila   | 373          | 373          | 541          | 138          |
|                                | Banaripara Upazila  | 217          | 217          | 977          | 366          |
|                                | Hijla Upazila       | 155          | 155          | 986          | 218          |
|                                | Mehendiganj Upazila | 320          | 317          | 700          | 166          |
|                                | Muladi Upazila      | 193          | 193          | 948          | 312          |
|                                | Agailjhara Upazila  | 138          | 138          | 290          | 194          |
| <b>October Total</b>           |                     | <b>1396</b>  | <b>1393</b>  | <b>4442</b>  | <b>1394</b>  |
| November                       | Bakerganj Upazila   | 368          | 356          | 653          | 141          |
|                                | Banaripara Upazila  | 218          | 203          | 1261         | 344          |
|                                | Hijla Upazila       | 158          | 150          | 1383         | 216          |
|                                | Mehendiganj Upazila | 320          | 297          | 789          | 164          |
|                                | Muladi Upazila      | 194          | 164          | 1214         | 312          |
|                                | Agailjhara Upazila  | 138          | 129          | 585          | 192          |
| <b>November Total</b>          |                     | <b>1396</b>  | <b>1299</b>  | <b>5885</b>  | <b>1369</b>  |
| December                       | Bakerganj Upazila   | 372          | 192          | 603          | 56           |
|                                | Banaripara Upazila  | 217          | 136          | 1124         | 455          |
|                                | Hijla Upazila       | 147          | 86           | 1321         | 217          |
|                                | Mehendiganj Upazila | 336          | 188          | 912          | 165          |
|                                | Muladi Upazila      | 194          | 140          | 1124         | 312          |
|                                | Agailjhara Upazila  | 138          | 102          | 662          | 193          |
| <b>December Total</b>          |                     | <b>1404</b>  | <b>844</b>   | <b>5746</b>  | <b>1398</b>  |
| <b>Grand Total (full Year)</b> |                     | <b>16912</b> | <b>15505</b> | <b>34838</b> | <b>16636</b> |

| <b>2019</b>                 |                       |
|-----------------------------|-----------------------|
| # Immunization Session Held | Care-seeking children |
| 139                         | 738                   |
| 371                         | 121                   |
| 219                         | 1201                  |
| 167                         | 247                   |
| 312                         | 106                   |
| 195                         | 120                   |
| <b>1403</b>                 | <b>2533</b>           |
| 136                         | 842                   |
| 364                         | 552                   |
| 215                         | 1060                  |
| 163                         | 552                   |
| 312                         | 178                   |
| 191                         | 239                   |
| <b>1381</b>                 | <b>3423</b>           |
| 138                         | 759                   |
| 371                         | 452                   |
| 216                         | 1283                  |
| 162                         | 781                   |
| 312                         | 171                   |
| 191                         | 104                   |
| <b>1390</b>                 | <b>2791</b>           |
| 143                         | 779                   |
| 371                         | 120                   |
| 216                         | 1414                  |
| 139                         | 461                   |
| 312                         | 104                   |
| 192                         | 130                   |
| <b>1373</b>                 | <b>3008</b>           |
| 120                         | 589                   |
| 370                         | 480                   |
| 216                         | 1521                  |
| 163                         | 474                   |
| 312                         | 151                   |
| 192                         | 78                    |
| <b>1373</b>                 | <b>3293</b>           |
| 142                         | 787                   |
| 366                         | 313                   |
| 214                         | 1394                  |
| 162                         | 1217                  |
| 312                         | 199                   |
| 190                         | 138                   |
| <b>1386</b>                 | <b>4048</b>           |
| 136                         | 700                   |
| 369                         | 500                   |

|              |              |
|--------------|--------------|
| 219          | 1355         |
| 159          | 764          |
| 312          | 195          |
| 195          | 120          |
| <b>1390</b>  | <b>3634</b>  |
| 134          | 865          |
| 368          | 364          |
| 214          | 1376         |
| 166          | 325          |
| 312          | 289          |
| 193          | 178          |
| <b>1387</b>  | <b>3397</b>  |
| 138          | 784          |
| 367          | 105          |
| 217          | 1449         |
| 165          | 199          |
| 312          | 184          |
| 193          | 109          |
| <b>1392</b>  | <b>2830</b>  |
| 138          | 631          |
| 366          | 168          |
| 218          | 1528         |
| 166          | 346          |
| 311          | 111          |
| 194          | 174          |
| <b>1393</b>  | <b>2958</b>  |
| 141          | 723          |
| 344          | 155          |
| 216          | 1392         |
| 164          | 1035         |
| 289          | 130          |
| 192          | 172          |
| <b>1346</b>  | <b>3607</b>  |
| 56           | 723          |
| 367          | 110          |
| 217          | 1350         |
| 165          | 1030         |
| 312          | 163          |
| 193          | 180          |
| <b>1310</b>  | <b>3556</b>  |
| <b>16524</b> | <b>39078</b> |
